# Supplementary material
Source: PubMed Central journal article supplement (PMC7138725)
Supplement: NIHMS1565505-supplement-Supplemental_Publication_Material.pdf [file NIHMS1565505-supplement-Supplemental_Publication_Material.pdf]

## SUPPLEMENTAL MATERIAL

### Supplemental Figures and Figure Legends

**Supplemental Figure 1.** The flowchart of study participant inclusions and exclusions.

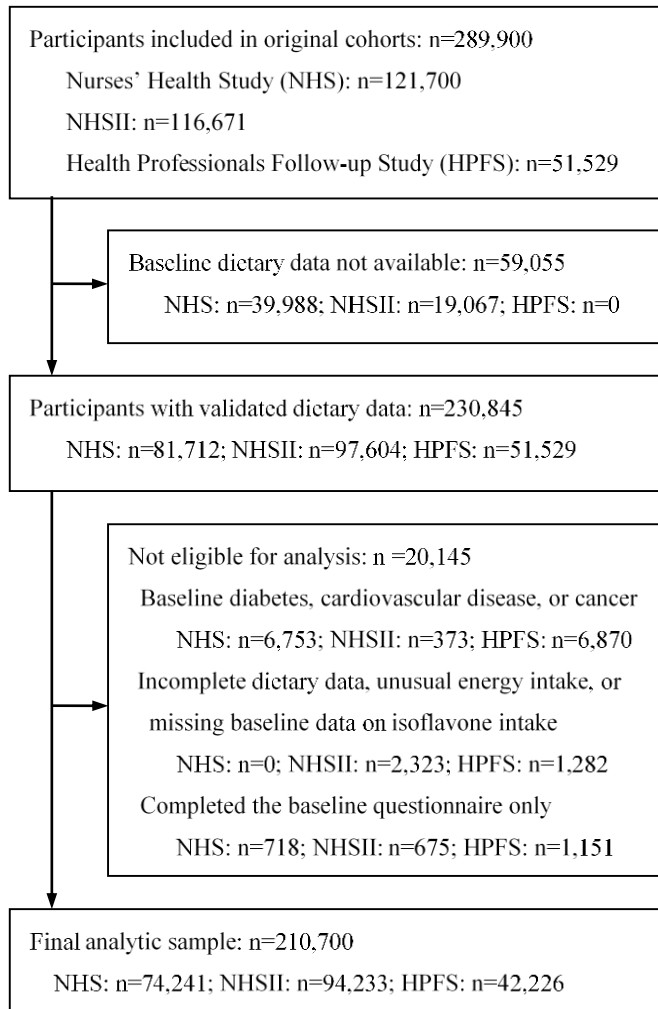

## Supplemental Tables

**Supplemental Table 1.** The top five food contributors to intake of total isoflavones and individual isoflavones in three cohorts (NHS 1998, NHSII 1999, HPFS 2002).

|             | Rank | NHS                                       |      | NHSII                                     |      | HPFS                                      |      |
|-------------|------|-------------------------------------------|------|-------------------------------------------|------|-------------------------------------------|------|
|             |      | Food group                                | %    | Food group                                | %    | Food group                                | %    |
| Isoflavones |      |                                           |      |                                           |      |                                           |      |
|             | 1    | Tofu                                      | 32.3 | Tofu                                      | 33.1 | Tofu                                      | 42.2 |
|             | 2    | Soymilk                                   | 23.8 | Soymilk                                   | 21.7 | Soymilk                                   | 23.8 |
|             | 3    | Coffee                                    | 6.4  | Coffee                                    | 4.0  | Coffee                                    | 5.3  |
|             | 4    | Dark bread                                | 3.1  | Frozen yogurt, sherbet, non-fat ice cream | 2.6  | Hotdog                                    | 2.7  |
|             | 5    | Frozen yogurt, sherbet, non-fat ice cream | 2.9  | Cold cereal                               | 2.5  | Dark bread                                | 2.4  |
| Daidzein    |      |                                           |      |                                           |      |                                           |      |
|             | 1    | Tofu                                      | 30.4 | Tofu                                      | 32.5 | Tofu                                      | 39.8 |
|             | 2    | Soymilk                                   | 22.7 | Soymilk                                   | 21.7 | Soymilk                                   | 22.8 |
|             | 3    | Coffee                                    | 11.7 | Coffee                                    | 7.7  | Coffee                                    | 9.8  |
|             | 4    | Cold cereal                               | 3.1  | Cold cereal                               | 3.1  | Hotdog                                    | 3.5  |
|             | 5    | Hotdog                                    | 3.0  | Frozen yogurt, sherbet, non-fat ice cream | 2.5  | Dark bread                                | 2.2  |
| Genistein   |      |                                           |      |                                           |      |                                           |      |
|             | 1    | Tofu                                      | 32.7 | Tofu                                      | 32.2 | Tofu                                      | 43.2 |
|             | 2    | Soymilk                                   | 19.2 | Soymilk                                   | 16.9 | Soymilk                                   | 19.4 |
|             | 3    | Dark bread                                | 3.6  | Frozen yogurt, sherbet, non-fat ice cream | 2.8  | Coffee                                    | 2.9  |
|             | 4    | Coffee                                    | 3.5  | Cold cereal                               | 2.3  | Dark bread                                | 2.8  |
|             | 5    | Frozen yogurt, sherbet, non-fat ice cream | 3.4  | Coffee                                    | 2.1  | Frozen yogurt, sherbet, non-fat ice cream | 2.6  |
| Glycitein   |      |                                           |      |                                           |      |                                           |      |
|             | 1    | Soymilk                                   | 43.1 | Soymilk                                   | 38.7 | Soymilk                                   | 45.8 |
|             | 2    | Tofu                                      | 36.8 | Tofu                                      | 37.1 | Tofu                                      | 41.1 |
|             | 3    | Dark bread                                | 2.1  | Frozen yogurt, sherbet, non-fat ice cream | 1.6  | Dark bread                                | 1.5  |
|             | 4    | Frozen yogurt, sherbet, non-fat ice cream | 1.9  | Cold cereal                               | 1.5  | Frozen yogurt, sherbet, non-fat ice cream | 1.4  |
|             | 5    | Cold cereal                               | 1.6  | Dark bread                                | 1.1  | Hotdog                                    | 1.0  |

HPFS, Health Professionals Follow-up Study; NHS, Nurses' Health Study.

**Supplemental Table 2.** Age-standardized characteristics of participants according to consumption of tofu at the midpoint of follow-up (NHS1998, NHSII 1999, HPFS1998) \*

|                                                    | NHS                 |                    |                    | NHSII               |                    |                    | HPFS                |                    |                    |
|----------------------------------------------------|---------------------|--------------------|--------------------|---------------------|--------------------|--------------------|---------------------|--------------------|--------------------|
|                                                    | <1<br>serving/month | <1<br>serving/week | ≥1<br>serving/week | <1<br>serving/month | <1<br>serving/week | ≥1<br>serving/week | <1<br>serving/month | <1<br>serving/week | ≥1<br>serving/week |
| Participants, n                                    | 56842               | 9453               | 2392               | 76034               | 12844              | 4188               | 27820               | 7886               | 1678               |
| Age ‡, years                                       | 63.9 †              | 63.5               | 64.1               | 46.3                | 46.3               | 46.8               | 66.4                | 64.7               | 65.0               |
| Caucasians, %                                      | 98                  | 96                 | 89                 | 96                  | 93                 | 88                 | 96                  | 93                 | 78                 |
| Asian, %                                           | 0                   | 2                  | 9                  | 1                   | 4                  | 9                  | 0                   | 3                  | 18                 |
| Level education of partner, % of college and above | 72                  | 75                 | 71                 | 65                  | 73                 | 72                 | -                   | -                  | -                  |
| Self-rated socioeconomic status, % of Top 30%      | 34                  | 43                 | 40                 | 30                  | 39                 | 37                 | -                   | -                  | -                  |
| Current smoker, %                                  | 11                  | 7                  | 6                  | 9                   | 6                  | 6                  | 4                   | 3                  | 2                  |
| Alcohol intake, g/day                              | 5.0                 | 5.3                | 4.1                | 3.6                 | 4.8                | 4.0                | 11.1                | 10.6               | 8.5                |
| Physical activity, MET/week                        | 16.0                | 21.2               | 23.3               | 19.0                | 25.7               | 29.8               | 30.9                | 36.2               | 39.1               |
| BMI, kg/m <sup>2</sup>                             | 26.8                | 26.2               | 25.8               | 27.2                | 25.4               | 25.0               | 26.3                | 25.9               | 25.3               |
| Family history of myocardial infarction, %         | 39                  | 38                 | 35                 | 33                  | 30                 | 31                 | 31                  | 31                 | 31                 |
| Multivitamin use, %                                | 53                  | 62                 | 60                 | 45                  | 55                 | 56                 | 47                  | 56                 | 50                 |
| Current use of aspirin, %                          | 47                  | 50                 | 44                 |                     |                    |                    | 38                  | 41                 | 31                 |
| Hypertension, %                                    | 45                  | 42                 | 41                 | 20                  | 9                  | 10                 | 40                  | 39                 | 37                 |
| Hypercholesterolemia, %                            | 57                  | 56                 | 54                 | 34                  | 16                 | 21                 | 47                  | 49                 | 46                 |
| Postmenopausal women, %                            | 6                   | 6                  | 6                  | 60                  | 66                 | 66                 | -                   | -                  | -                  |
| Ever menopausal hormone use, %                     | 63                  | 68                 | 65                 | 25                  | 22                 | 21                 | -                   | -                  | -                  |

|                                            |      |      |      |      |      |      |      |      |      |
|--------------------------------------------|------|------|------|------|------|------|------|------|------|
| Current use of oral-contraceptive, %       | -    | -    | -    | 7    | 8    | 7    | -    | -    | -    |
| Total energy intake, kcal/day              | 1736 | 1803 | 1846 | 1790 | 1850 | 1873 | 1968 | 2031 | 2067 |
| Modified AHEI score                        | 43.4 | 48.9 | 51.5 | 42.7 | 49.5 | 54.0 | 47.0 | 51.5 | 55.1 |
| Trans fat intake, % energy                 | 1.7  | 1.4  | 1.3  | 1.7  | 1.4  | 1.2  | 1.5  | 1.3  | 1.0  |
| Polyunsaturated fat-to-saturated fat ratio | 0.6  | 0.6  | 0.7  | 0.5  | 0.6  | 0.7  | 0.6  | 0.7  | 0.8  |
| Total fruits intake, servings/day          | 2.3  | 2.7  | 3.0  | 1.1  | 1.5  | 1.7  | 2.3  | 2.8  | 3.3  |
| Total vegetables intake, servings/day      | 3.1  | 3.7  | 4.3  | 3.0  | 4.0  | 5.1  | 3.0  | 3.8  | 4.5  |
| Red meats intake, servings/day             | 0.9  | 0.7  | 0.6  | 0.8  | 0.6  | 0.4  | 1.1  | 0.9  | 0.7  |

AHEI, alternative health eating index; BMI, body mass index; HPFS, the Health Professionals Follow-Up Study; MET, metabolic equivalents of task; NHS, Nurses' Health Study.

\* Values were standardized to the age distribution of the study population.

† Data are mean unless otherwise indicated.

‡ Values were not age adjusted.

**Supplemental Table 3.** Hazard ratio (95% CI) of coronary heart disease according to quintiles of individual isoflavones.

|                                           | Quintile of intake |                   |                   |                   |                   | <i>P</i> trend |
|-------------------------------------------|--------------------|-------------------|-------------------|-------------------|-------------------|----------------|
|                                           | 1 (low)            | 2                 | 3                 | 4                 | 5 (high)          |                |
| <b>Daidzein</b>                           |                    |                   |                   |                   |                   |                |
| NHS                                       |                    |                   |                   |                   |                   |                |
| Age-adjusted model *                      | 1                  | 0.90 (0.81, 1.00) | 0.87 (0.78, 0.96) | 0.98 (0.88, 1.08) | 0.90 (0.81, 1.00) | 0.30           |
| Multivariable-adjusted model <sup>†</sup> | 1                  | 0.89 (0.81, 0.99) | 0.83 (0.75, 0.93) | 0.86 (0.77, 0.95) | 0.85 (0.76, 0.94) | 0.02           |
| Fully-adjusted model <sup>‡</sup>         | 1                  | 0.89 (0.81, 0.99) | 0.83 (0.75, 0.93) | 0.87 (0.78, 0.96) | 0.88 (0.79, 0.98) | 0.12           |
| NHS II                                    |                    |                   |                   |                   |                   |                |
| Age-adjusted model *                      | 1                  | 0.95 (0.75, 1.19) | 0.87 (0.69, 1.09) | 0.83 (0.66, 1.04) | 0.58 (0.45, 0.75) | <0.001         |
| Multivariable-adjusted model <sup>†</sup> | 1                  | 1.00 (0.79, 1.26) | 0.87 (0.69, 1.11) | 0.74 (0.59, 0.94) | 0.63 (0.48, 0.82) | <0.001         |
| Fully-adjusted model <sup>‡</sup>         | 1                  | 1.01 (0.80, 1.27) | 0.90 (0.71, 1.14) | 0.78 (0.61, 0.99) | 0.70 (0.54, 0.92) | 0.005          |
| HPFS                                      |                    |                   |                   |                   |                   |                |
| Age-adjusted model *                      | 1                  | 0.92 (0.83, 1.01) | 0.92 (0.83, 1.01) | 0.94 (0.85, 1.03) | 0.80 (0.72, 0.89) | <0.001         |
| Multivariable-adjusted model <sup>†</sup> | 1                  | 0.92 (0.84, 1.01) | 0.91 (0.83, 1.00) | 0.91 (0.83, 1.00) | 0.83 (0.75, 0.92) | 0.002          |
| Fully-adjusted model <sup>‡</sup>         | 1                  | 0.92 (0.84, 1.01) | 0.91 (0.83, 1.00) | 0.92 (0.83, 1.01) | 0.89 (0.80, 0.98) | 0.09           |
| Pooled results <sup>§</sup>               |                    |                   |                   |                   |                   |                |
| Age-adjusted model *                      | 1                  | 0.91 (0.85, 0.97) | 0.89 (0.83, 0.95) | 0.94 (0.88, 1.01) | 0.82 (0.77, 0.88) | <0.001         |
| Multivariable-adjusted model <sup>†</sup> | 1                  | 0.91 (0.86, 0.98) | 0.87 (0.82, 0.93) | 0.87 (0.82, 0.93) | 0.82 (0.76, 0.88) | <0.001         |
| Fully-adjusted model <sup>‡</sup>         | 1                  | 0.92 (0.86, 0.98) | 0.88 (0.82, 0.94) | 0.88 (0.82, 0.94) | 0.87 (0.81, 0.93) | 0.002          |
| <b>Genistein</b>                          |                    |                   |                   |                   |                   |                |
| NHS                                       |                    |                   |                   |                   |                   |                |
| Age-adjusted model *                      | 1                  | 0.87 (0.78, 0.96) | 0.94 (0.84, 1.04) | 1.05 (0.95, 1.16) | 0.84 (0.75, 0.93) | 0.004          |
| Multivariable-adjusted model <sup>†</sup> | 1                  | 0.88 (0.79, 0.97) | 0.90 (0.81, 1.00) | 0.94 (0.85, 1.04) | 0.87 (0.78, 0.97) | 0.10           |
| Fully-adjusted model <sup>‡</sup>         | 1                  | 0.88 (0.79, 0.98) | 0.91 (0.82, 1.01) | 0.95 (0.86, 1.06) | 0.92 (0.83, 1.03) | 0.65           |
| NHS II                                    |                    |                   |                   |                   |                   |                |
| Age-adjusted model *                      | 1                  | 0.99 (0.79, 1.24) | 0.92 (0.74, 1.16) | 0.78 (0.61, 0.98) | 0.48 (0.37, 0.64) | <0.001         |
| Multivariable-adjusted model <sup>†</sup> | 1                  | 1.04 (0.83, 1.31) | 0.92 (0.73, 1.15) | 0.74 (0.58, 0.94) | 0.59 (0.45, 0.78) | <0.001         |
| Fully-adjusted model <sup>‡</sup>         | 1                  | 1.07 (0.85, 1.34) | 0.95 (0.76, 1.20) | 0.79 (0.62, 1.01) | 0.67 (0.50, 0.90) | 0.004          |
| HPFS                                      |                    |                   |                   |                   |                   |                |
| Age-adjusted model *                      | 1                  | 0.91 (0.83, 1.00) | 0.96 (0.88, 1.06) | 0.96 (0.87, 1.05) | 0.77 (0.70, 0.85) | <0.001         |
| Multivariable-adjusted model <sup>†</sup> | 1                  | 0.92 (0.84, 1.01) | 0.96 (0.88, 1.06) | 0.95 (0.86, 1.04) | 0.82 (0.74, 0.91) | <0.001         |
| Fully-adjusted model <sup>‡</sup>         | 1                  | 0.94 (0.85, 1.03) | 0.98 (0.89, 1.08) | 0.98 (0.89, 1.08) | 0.90 (0.81, 1.00) | 0.08           |
| Pooled results <sup>§</sup>               |                    |                   |                   |                   |                   |                |
| Age-adjusted model *                      | 1                  | 0.90 (0.84, 0.96) | 0.95 (0.89, 1.01) | 0.98 (0.92, 1.05) | 0.77 (0.72, 0.83) | <0.001         |
| Multivariable-adjusted model <sup>†</sup> | 1                  | 0.91 (0.85, 0.97) | 0.93 (0.87, 1.00) | 0.93 (0.87, 0.99) | 0.82 (0.77, 0.89) | <0.001         |
| Fully-adjusted model <sup>‡</sup>         | 1                  | 0.93 (0.86, 0.99) | 0.95 (0.89, 1.02) | 0.95 (0.89, 1.02) | 0.89 (0.83, 0.96) | 0.01           |
| <b>Glycitein</b>                          |                    |                   |                   |                   |                   |                |
| NHS                                       |                    |                   |                   |                   |                   |                |
| Age-adjusted model *                      | 1                  | 0.72 (0.62, 0.85) | 0.61 (0.51, 0.74) | 0.64 (0.54, 0.76) | 0.58 (0.49, 0.68) | <0.001         |
| Multivariable-adjusted model <sup>†</sup> | 1                  | 0.88 (0.75, 1.04) | 0.80 (0.66, 0.96) | 0.80 (0.67, 0.95) | 0.80 (0.67, 0.95) | 0.03           |

|                                           |   |                   |                   |                   |                   |        |
|-------------------------------------------|---|-------------------|-------------------|-------------------|-------------------|--------|
| Fully-adjusted model <sup>‡</sup>         | 1 | 0.89 (0.76, 1.06) | 0.80 (0.67, 0.97) | 0.81 (0.68, 0.97) | 0.85 (0.72, 1.01) | 0.35   |
| NHS II                                    |   |                   |                   |                   |                   |        |
| Age-adjusted model *                      | 1 | 0.56 (0.45, 0.70) | 0.45 (0.27, 0.76) | 0.51 (0.34, 0.77) | 0.29 (0.18, 0.47) | <0.001 |
| Multivariable-adjusted model <sup>†</sup> | 1 | 0.68 (0.54, 0.85) | 0.55 (0.33, 0.92) | 0.68 (0.45, 1.03) | 0.43 (0.27, 0.70) | <0.001 |
| Fully-adjusted model <sup>‡</sup>         | 1 | 0.70 (0.56, 0.88) | 0.60 (0.36, 1.02) | 0.75 (0.49, 1.15) | 0.49 (0.30, 0.80) | 0.005  |
| HPFS                                      |   |                   |                   |                   |                   |        |
| Age-adjusted model *                      | 1 | 0.81 (0.70, 0.94) | 0.64 (0.54, 0.76) | 0.77 (0.66, 0.89) | 0.65 (0.56, 0.76) | <0.001 |
| Multivariable-adjusted model <sup>†</sup> | 1 | 0.90 (0.78, 1.05) | 0.76 (0.64, 0.90) | 0.86 (0.74, 1.01) | 0.78 (0.67, 0.91) | 0.002  |
| Fully-adjusted model <sup>‡</sup>         | 1 | 0.93 (0.80, 1.07) | 0.77 (0.65, 0.91) | 0.90 (0.77, 1.04) | 0.86 (0.74, 1.01) | 0.17   |
| Pooled results <sup>§</sup>               |   |                   |                   |                   |                   |        |
| Age-adjusted model *                      | 1 | 0.73 (0.66, 0.80) | 0.62 (0.55, 0.70) | 0.69 (0.62, 0.77) | 0.59 (0.53, 0.66) | <0.001 |
| Multivariable-adjusted model <sup>†</sup> | 1 | 0.85 (0.77, 0.94) | 0.76 (0.67, 0.86) | 0.82 (0.74, 0.92) | 0.76 (0.68, 0.85) | <0.001 |
| Fully-adjusted model <sup>‡</sup>         | 1 | 0.87 (0.78, 0.96) | 0.77 (0.68, 0.87) | 0.85 (0.76, 0.95) | 0.83 (0.74, 0.93) | 0.003  |

CI, confidence interval; HPFS, Health Professionals Follow-up Study; HR, hazard ratio; NHS, Nurses' Health Study.

\* Estimates are calculated in Cox proportional hazards models. Age-adjusted model, adjusted for age (years).

<sup>†</sup> Multivariable-adjusted model, further adjusted for ethnicity (Caucasian, African American, Asian, and other ethnicity), self-rated socioeconomic status (top 30%, median 40%, and bottom 30% for women), partner's education (<high school, high school, and above college for women), smoking status (never, former, current [1-14, 15-24, or ≥25 cigarettes/day], or missing), alcohol intake (0, 0.1-4.9, 5.0-14.9, and ≥15.0 g/day for women, 0, 0.1-4.9, 5.0-29.9, and ≥30.0 g/day for men, or missing), physical activity (metabolic equivalents of tasks-hr/week), multivitamin use (yes/no), aspirin use (yes/no), history of hypertension (yes/no) and hypercholesterolemia (yes/no), family history of early myocardial infarction (yes/no), menopausal status and post-menopausal hormone use (pre-menopause, post-menopause [never, former, or current hormone use], or missing, for women), oral contraceptive use (yes, no, or missing, for NHS II), body mass index (kg/m<sup>2</sup>), and total energy intake (kcal/day) based on age-adjusted model.

<sup>‡</sup> Fully-adjusted model, further adjusted for modified alternative health eating index score, based on multivariable-adjusted model.

<sup>§</sup> Results from each cohort were pooled using fixed-effects model.

**Supplemental Table 4.** Stratified hazard ratio (95% CI) of coronary heart disease according to quintiles of isoflavone intake by various characteristics of participants

|                          | Quintile of isoflavone intake |                   |                   |                   |                   | <i>P</i> <sub>trend</sub> | <i>P</i> <sub>interaction</sub> <sup>†</sup> |
|--------------------------|-------------------------------|-------------------|-------------------|-------------------|-------------------|---------------------------|----------------------------------------------|
|                          | 1 (low)                       | 2                 | 3                 | 4                 | 5 (high)          |                           |                                              |
| Race                     |                               |                   |                   |                   |                   |                           | 0.18                                         |
| Caucasians               |                               |                   |                   |                   |                   |                           |                                              |
| No. of case/person years | 54/28592                      | 55/31837          | 35/27620          | 39/24574          | 78/65076          |                           |                                              |
| Fully-adjusted HR *      | 1                             | 0.91 (0.86, 0.98) | 0.89 (0.83, 0.95) | 0.90 (0.84, 0.97) | 0.87 (0.81, 0.94) | 0.01                      |                                              |
| Other races              |                               |                   |                   |                   |                   |                           |                                              |
| No. of case/person years | 1833/934956                   | 1677/937307       | 1640/933589       | 1661/938618       | 1287/903954       |                           |                                              |
| Fully-adjusted HR *      | 1                             | 0.91 (0.61, 1.36) | 0.69 (0.44, 1.08) | 0.84 (0.53, 1.31) | 0.66 (0.46, 0.96) | 0.08                      |                                              |
| Age                      |                               |                   |                   |                   |                   |                           | 0.44                                         |
| < 65 years               |                               |                   |                   |                   |                   |                           |                                              |
| No. of case/person years | 966/155262                    | 900/159844        | 897/155463        | 973/147206        | 798/137168        |                           |                                              |
| Fully-adjusted HR *      | 1                             | 0.88 (0.76, 1.01) | 0.82 (0.71, 0.95) | 0.79 (0.68, 0.90) | 0.79 (0.68, 0.91) | 0.02                      |                                              |
| ≥ 65 years               |                               |                   |                   |                   |                   |                           |                                              |
| No. of case/person years | 917/805712                    | 829/806833        | 775/803681        | 723/813798        | 563/829709        |                           |                                              |
| Fully-adjusted HR *      | 1                             | 0.93 (0.85, 1.00) | 0.89 (0.82, 0.97) | 0.93 (0.86, 1.02) | 0.91 (0.83, 1.00) | 0.32                      |                                              |
| BMI                      |                               |                   |                   |                   |                   |                           | 0.26                                         |
| < 30 kg/m <sup>2</sup>   |                               |                   |                   |                   |                   |                           |                                              |
| No. of case/person years | 1458/750056                   | 1338/762652       | 1324/768885       | 1314/775536       | 1102/809027       |                           |                                              |
| Fully-adjusted HR *      | 1                             | 0.93 (0.86, 1.00) | 0.92 (0.86, 1.00) | 0.94 (0.87, 1.01) | 0.93 (0.85, 1.00) | 0.22                      |                                              |
| ≥ 30 kg/m <sup>2</sup>   |                               |                   |                   |                   |                   |                           |                                              |
| No. of case/person years | 421/59591                     | 386/53447         | 342/47358         | 379/43996         | 259/34608         |                           |                                              |
| Fully-adjusted HR *      | 1                             | 0.88 (0.77, 1.01) | 0.79 (0.68, 0.91) | 0.84 (0.72, 0.96) | 0.76 (0.65, 0.89) | 0.03                      |                                              |
| Modified AHEI score      |                               |                   |                   |                   |                   |                           | 0.40                                         |
| < median level           |                               |                   |                   |                   |                   |                           |                                              |
| No. of case/person years | 908/488575                    | 808/464812        | 789/432274        | 791/391322        | 425/244194        |                           |                                              |
| Fully-adjusted HR *      | 1                             | 0.94 (0.85, 1.03) | 0.91 (0.83, 1.01) | 0.94 (0.85, 1.04) | 0.89 (0.79, 1.00) | 0.25                      |                                              |
| ≥ median level           |                               |                   |                   |                   |                   |                           |                                              |

|                          |             |                   |                   |                   |                   |      |      |
|--------------------------|-------------|-------------------|-------------------|-------------------|-------------------|------|------|
| No. of case/person years | 914/458944  | 881/488710        | 822/513089        | 839/556250        | 903/708866        |      |      |
| Fully-adjusted HR *      | 1           | 0.94 (0.85, 1.03) | 0.90 (0.82, 0.99) | 0.90 (0.82, 0.99) | 0.87 (0.79, 0.95) | 0.03 |      |
| Physical activity        |             |                   |                   |                   |                   |      | 0.27 |
| < median level           |             |                   |                   |                   |                   |      |      |
| No. of case/person years | 1099/487484 | 1021/482855       | 940/471862        | 971/473114        | 704/405824        |      |      |
| Fully-adjusted HR *      | 1           | 0.95 (0.87, 1.03) | 0.88 (0.81, 0.96) | 0.91 (0.83, 0.99) | 0.86 (0.78, 0.95) | 0.02 |      |
| ≥ median level           |             |                   |                   |                   |                   |      |      |
| No. of case/person years | 756/461488  | 689/473338        | 717/477088        | 709/475549        | 645/550874        |      |      |
| Fully-adjusted HR *      | 1           | 0.88 (0.79, 0.98) | 0.90 (0.81, 1.00) | 0.91 (0.82, 1.01) | 0.89 (0.80, 0.99) | 0.29 |      |
| Smoking status           |             |                   |                   |                   |                   |      | 0.15 |
| Never                    |             |                   |                   |                   |                   |      |      |
| No. of case/person years | 1727/907150 | 1533/903075       | 1402/866298       | 1340/822461       | 1113/862930       |      |      |
| Fully-adjusted HR *      | 1           | 0.90 (0.84, 0.97) | 0.88 (0.82, 0.94) | 0.93 (0.86, 1.00) | 0.87 (0.80, 0.94) | 0.01 |      |
| Ever                     |             |                   |                   |                   |                   |      |      |
| No. of case/person years | 160/56398   | 199/66067         | 273/94911         | 360/140731        | 252/106102        |      |      |
| Fully-adjusted HR *      | 1           | 1.07 (0.87, 1.32) | 1.01 (0.83, 1.23) | 0.92 (0.76, 1.11) | 0.95 (0.78, 1.17) | 0.49 |      |
| Alcohol consumption      |             |                   |                   |                   |                   |      | 0.98 |
| Never                    |             |                   |                   |                   |                   |      |      |
| No. of case/person years | 929/463030  | 708/380240        | 576/302846        | 648/294132        | 546/336474        |      |      |
| Fully-adjusted HR *      | 1           | 0.94 (0.85, 1.04) | 0.88 (0.80, 0.98) | 0.95 (0.86, 1.05) | 0.85 (0.77, 0.95) | 0.03 |      |
| Ever                     |             |                   |                   |                   |                   |      |      |
| No. of case/person years | 958/500518  | 1024/588903       | 1099/658362       | 1052/669060       | 819/632557        |      |      |
| Fully-adjusted HR *      | 1           | 0.91 (0.83, 1.00) | 0.91 (0.83, 0.99) | 0.90 (0.82, 0.98) | 0.88 (0.80, 0.97) | 0.06 |      |

AHEI, alternative health eating index; CI, confidence interval; BMI, body mass index; HR, hazard ratio.

\* Estimates are calculated in Cox proportional hazards models, adjusted for ethnicity (Caucasian, African American, Asian, and other ethnicity), self-rated socioeconomic status (top 30%, median 40%, or bottom 30%, for women), partner's education (<high school, high school, or above college, for women), smoking status (never, former, current [1-14, 15-24, or ≥25 cigarettes/day], or missing), alcohol intake (0, 0.1-4.9, 5.0-14.9, and ≥15.0 g/day for women, 0, 0.1-4.9, 5.0-29.9, and ≥30.0 g/day for men, or missing), physical activity (metabolic equivalents of tasks-hr/week), multivitamin use (yes/no), aspirin use (yes/no), history of hypertension (yes/no) and hypercholesterolemia (yes/no), family history of early myocardial infarction (yes/no), menopausal status and post-menopausal hormone



use (pre-menopause, post-menopause [never, former, or current hormone use], or missing, for women), oral contraceptive use (yes, no, or missing, for Nurses' Health Study II), BMI (kg/m<sup>2</sup>), total energy intake (kcal/day), and the modified alternative health eating index score.

<sup>†</sup>  $P_{\text{interaction}}$  was calculated using likelihood-ratio test.

**Supplemental Table 5.** Stratified hazard ratio (95% CI) of coronary heart disease according to consumption of tofu by various characteristics of participants \*

|                          | Consumption of tofu |                   |                   | <i>P</i> <sub>trend</sub> | <i>P</i> <sub>interaction</sub> <sup>†</sup> |
|--------------------------|---------------------|-------------------|-------------------|---------------------------|----------------------------------------------|
|                          | <1 serving/month    | <1 serving/week   | ≥1 serving/week   |                           |                                              |
| Race                     |                     |                   |                   |                           | 0.18                                         |
| Caucasians               |                     |                   |                   |                           |                                              |
| No. of case/person years | 6749/3890016        | 981/624525        | 192/165688        |                           |                                              |
| Fully-adjusted HR *      | 1                   | 0.92 (0.86, 0.98) | 0.86 (0.73, 1.01) | 0.01                      |                                              |
| Other races              |                     |                   |                   |                           |                                              |
| No. of case/person years | 173/112819          | 53/39358          | 27/27047          |                           |                                              |
| Fully-adjusted HR *      | 1                   | 1.05 (0.96, 1.16) | 0.58 (0.37, 0.92) | 0.03                      |                                              |
| Age                      |                     |                   |                   |                           | 0.02                                         |
| < 65 years               |                     |                   |                   |                           |                                              |
| No. of case/person years | 2739/3061596        | 335/463209        | 63/143145         |                           |                                              |
| Fully-adjusted HR *      | 1                   | 0.76 (0.63, 0.91) | 0.74 (0.51, 1.08) | 0.01                      |                                              |
| ≥ 65 years               |                     |                   |                   |                           |                                              |
| No. of case/person years | 4183/941239         | 699/200674        | 156/49591         |                           |                                              |
| Fully-adjusted HR *      | 1                   | 0.95 (0.87, 1.03) | 0.96 (0.80, 1.15) | 0.37                      |                                              |
| BMI                      |                     |                   |                   |                           | 0.51                                         |
| < 30 kg/m <sup>2</sup>   |                     |                   |                   |                           |                                              |
| No. of case/person years | 5324/3172993        | 857/558639        | 184/164864        |                           |                                              |
| Fully-adjusted HR *      | 1                   | 0.94 (0.87, 1.01) | 0.83 (0.71, 0.98) | 0.02                      |                                              |
| ≥ 30 kg/m <sup>2</sup>   |                     |                   |                   |                           |                                              |
| No. of case/person years | 1567/808721         | 174/103233        | 35/27021          |                           |                                              |
| Fully-adjusted HR *      | 1                   | 0.89 (0.76, 1.04) | 0.81 (0.56, 1.19) | 0.10                      |                                              |
| Modified AHEI score      |                     |                   |                   |                           | 0.96                                         |
| < median level           |                     |                   |                   |                           |                                              |
| No. of case/person years | 3582/1922247        | 307/149716        | 41/26659          |                           |                                              |
| Fully-adjusted HR *      | 1                   | 0.90 (0.80, 1.01) | 0.77 (0.54, 1.10) | 0.06                      |                                              |
| ≥ median level           |                     |                   |                   |                           |                                              |

|                          |              |                   |                   |       |      |
|--------------------------|--------------|-------------------|-------------------|-------|------|
| No. of case/person years | 3103/2018092 | 699/502734        | 173/163088        |       |      |
| Fully-adjusted HR *      | 1            | 0.91 (0.84, 0.99) | 0.82 (0.69, 0.98) | 0.01  |      |
| Physical activity        |              |                   |                   |       | 0.83 |
| < median level           |              |                   |                   |       |      |
| No. of case/person years | 4032/2022452 | 487/252658        | 100/70216         |       |      |
| Fully-adjusted HR *      | 1            | 0.91 (0.82, 1.00) | 0.80 (0.64, 1.00) | 0.02  |      |
| ≥ median level           |              |                   |                   |       |      |
| No. of case/person years | 2790/1918785 | 543/408091        | 117/120672        |       |      |
| Fully-adjusted HR *      | 1            | 0.93 (0.85, 1.02) | 0.85 (0.69, 1.04) | 0.10  |      |
| Smoking status           |              |                   |                   |       | 0.78 |
| Never                    |              |                   |                   |       |      |
| No. of case/person years | 5802/3588736 | 940/625613        | 204/182331        |       |      |
| Fully-adjusted HR *      | 1            | 0.92 (0.86, 0.99) | 0.84 (0.72, 0.98) | 0.006 |      |
| Ever                     |              |                   |                   |       |      |
| No. of case/person years | 1120 /414100 | 94/38268          | 15/10404          |       |      |
| Fully-adjusted HR *      | 1            | 0.96 (0.77, 1.19) | 0.73 (0.39, 1.39) | 0.76  |      |
| Alcohol consumption      |              |                   |                   |       | 0.73 |
| Never                    |              |                   |                   |       |      |
| No. of case/person years | 2867/1505615 | 384/202964        | 91/78803          |       |      |
| Fully-adjusted HR *      | 1            | 0.97 (0.87, 1.08) | 0.71 (0.55, 0.90) | 0.05  |      |
| Ever                     |              |                   |                   |       |      |
| No. of case/person years | 4055/2497220 | 650/460918        | 128/113934        |       |      |
| Fully-adjusted HR *      | 1            | 0.89 (0.81, 0.96) | 0.89 (0.73, 1.08) | 0.02  |      |

AHEI, alternative health eating index; CI, confidence interval; BMI, body mass index.

\* Estimates are calculated in Cox proportional hazards models, adjusted for ethnicity (Caucasian, African American, Asian, and other ethnicity), self-rated socioeconomic status (top 30%, median 40%, or bottom 30%, for women), partner's education (<high school, high school, or above college, for women), smoking status (never, former, current [1-14, 15-24, or ≥25 cigarettes/day], or missing), alcohol intake (0, 0.1-4.9, 5.0-14.9, and ≥15.0 g/day for women, 0, 0.1-4.9, 5.0-29.9, and ≥30.0 g/day for men, or missing), physical activity (metabolic equivalents of tasks-hr/week), multivitamin use (yes/no), aspirin use (yes/no), history of hypertension (yes/no) and hypercholesterolemia (yes/no), family history of early myocardial infarction (yes/no), menopausal status and post-menopausal hormone

use (pre-menopause, post-menopause [never, former, or current hormone use], or missing, for women), oral contraceptive use (yes, no, or missing, for Nurses' Health Study II), BMI (kg/m<sup>2</sup>), total energy intake (kcal/day), and the modified alternative health eating index score.

<sup>†</sup>  $P_{\text{interaction}}$  was calculated using likelihood-ratio test.

**Supplemental Table 6.** Sensitivity analyses for the association between total isoflavone/tofu intake and coronary heart disease in three cohorts \*

|                                                                     | Consumption levels |                   |                   |                   |                   | <i>P</i> trend |
|---------------------------------------------------------------------|--------------------|-------------------|-------------------|-------------------|-------------------|----------------|
|                                                                     | Quintile 1         | Quintile 2        | Quintile 3        | Quintile 4        | Quintile 5        |                |
| Isoflavones                                                         |                    |                   |                   |                   |                   |                |
| Using baseline isoflavone intake as an exposure                     | 1                  | 0.99 (0.92, 1.06) | 1.02 (0.96, 1.10) | 0.98 (0.91, 1.05) | 0.95 (0.88, 1.02) | 0.09           |
| Adjustment for major dietary factors instead of modified AHEI score | 1                  | 0.91 (0.85, 0.97) | 0.87 (0.81, 0.93) | 0.87 (0.81, 0.93) | 0.83 (0.78, 0.90) | <0.001         |
| Using a 4-year lag period                                           | 1                  | 0.91 (0.85, 0.98) | 0.88 (0.82, 0.94) | 0.88 (0.82, 0.94) | 0.86 (0.80, 0.93) | 0.04           |
| Using an 8-year lag period                                          | 1                  | 0.92 (0.86, 0.99) | 0.86 (0.80, 0.92) | 0.91 (0.85, 0.98) | 0.88 (0.81, 0.95) | 0.07           |
| Excluding Asians                                                    | 1                  | 0.92 (0.86, 0.99) | 0.89 (0.83, 0.95) | 0.90 (0.84, 0.96) | 0.88 (0.82, 0.94) | 0.01           |
| Excluding probable CHD cases                                        | 1                  | 0.92 (0.85, 1.00) | 0.88 (0.81, 0.95) | 0.88 (0.81, 0.95) | 0.87 (0.80, 0.95) | 0.03           |
| Excluding soy/isoflavone supplement users                           | 1                  | 0.92 (0.86, 0.99) | 0.89 (0.83, 0.95) | 0.90 (0.84, 0.96) | 0.88 (0.82, 0.94) | 0.01           |
| Tofu                                                                | <1 serving/month   | <1 serving/week   | ≥1 serving/week   |                   |                   |                |
| Using baseline isoflavone intake as an exposure                     | 1                  | 0.91 (0.83, 0.99) | 0.81 (0.68, 0.97) |                   |                   | 0.02           |
| Adjustment for major dietary factors instead of modified AHEI score | 1                  | 0.87 (0.82, 0.94) | 0.75 (0.65, 0.88) |                   |                   | 0.008          |
| Using a 4-year lag period                                           | 1                  | 0.93 (0.87, 1.00) | 0.82 (0.70, 0.96) |                   |                   | 0.008          |
| Using an 8-year lag period                                          | 1                  | 0.91 (0.83, 0.98) | 0.84 (0.70, 1.00) |                   |                   | 0.01           |
| Excluding Asians                                                    | 1                  | 0.92 (0.86, 0.99) | 0.84 (0.72, 0.99) |                   |                   | 0.01           |
| Excluding probable CHD cases                                        | 1                  | 0.90 (0.83, 0.98) | 0.79 (0.65, 0.95) |                   |                   | 0.009          |
| Excluding soy/isoflavone supplement users                           | 1                  | 0.93 (0.86, 0.99) | 0.81 (0.70, 0.95) |                   |                   | 0.005          |

AHEI, alternative health eating index

\* Estimates are calculated in Cox proportional hazards models, adjusted for ethnicity (Caucasian, African American, Asian, and other ethnicity), self-rated socioeconomic status (top 30%, median 40%, or bottom 30%, for women), partner's education (<high school, high school, or above college, for women), smoking status (never, former, current [1-14, 15-24, or ≥25 cigarettes/day], or missing), alcohol intake (0, 0.1-4.9, 5.0-14.9, and ≥15.0 g/day for women, 0, 0.1-4.9, 5.0-29.9, and ≥30.0 g/day for men, or missing), physical activity (metabolic equivalents of tasks-hr/week), multivitamin use (yes/no), aspirin use (yes/no), history of hypertension (yes/no) and hypercholesterolemia (yes/no), family history of early myocardial infarction (yes/no), menopausal status and post-menopausal hormone use (pre-menopause, post-menopause [never, former, or current hormone use], or missing, for women), oral contraceptive use (yes, no, or missing, for Nurses' Health Study II), body mass index (kg/m<sup>2</sup>), total energy intake (kcal/day), and the modified alternative health eating index score.
